# Supplementary material for: Study on the Effect of G/CNT on the Enhanced Capacitance of IrO2-ZnO-G(CNT)/Ti Electrodes
Source: Research Square preprint supplement (doi:10.21203/rs.3.rs-985656/v1), 2021-10-25
Supplement: Supplementary file 1 [file ba502e23dc8484b9116bb4ae.docx]

**Supporting Information**

**Study on the effect of G/CNT on the enhanced capacitance of IrO2-ZnO-G(CNT)/Ti electrodes**

Tianfeng Ye,a Huixuan Wu,a Yanqun Shao,a,b,* Zhanghao Ye,a Guoyong Li,a Jinjin Wang,a Kongfa Chen,a

a College of Materials Science and Engineering, Fuzhou University, Fujian 350108, China

b College of Zhicheng, Fuzhou University, Fuzhou, Fujian 350002, China

* Corresponding authors. Tel.: +86 13960826600

E-mail address: [yqshao1989@163.com](mailto:yqshao1989@163.com) (Y. Shao)

All author. E-mail addresses: [1658361405@qq.com](mailto:1658361405@qq.com) (T. Ye)

[2675537574@qq.com](mailto:2675537574@qq.com) (H. Wu) [yqshao1989@163.com](mailto:yqshao1989@163.com) (Y. Shao)

578169849@qq.com (Z. Ye) 798215323@qq.com (G. Li)

1796669820@qq.com (J. Wang) [kongfa.chen@fzu.edu.cn](mailto:kongfa.chen@fzu.edu.cn) (K. Chen)


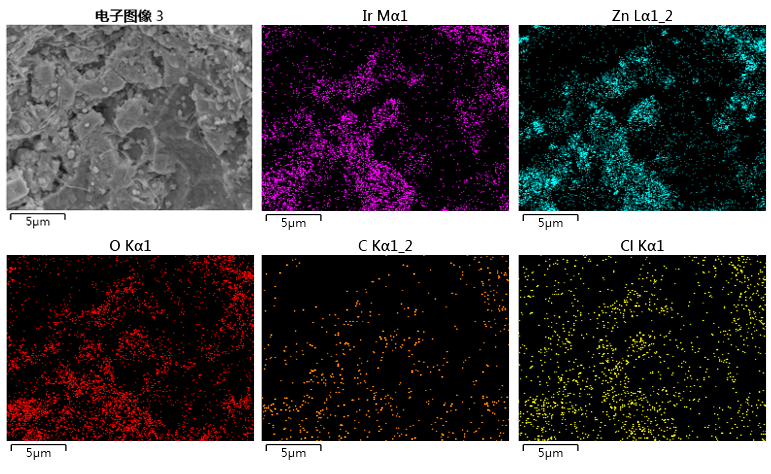


Fig. S1. EDX diagrams of IrO2-ZnO/Ti.


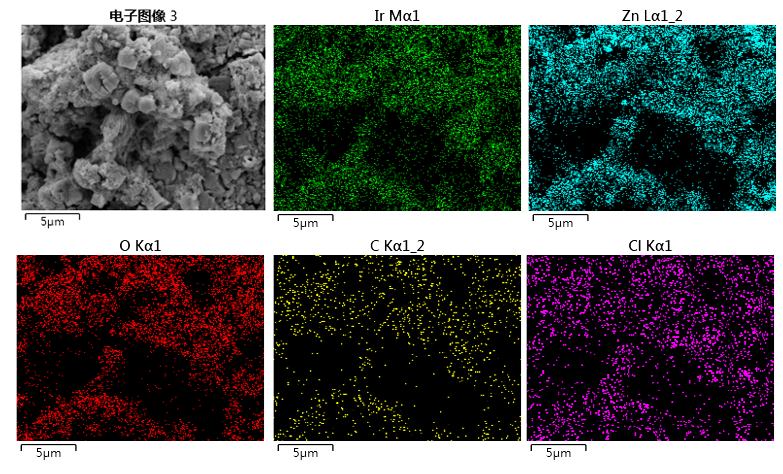


Fig. S2. EDX diagrams of IrO2-ZnO-G/Ti with [carbon nanotube](http://www.baidu.com/link?url=AdkmpROlQfeHlEEfgoZVZ922Pz0xF61gt9jw60Jkx5fkpTlGl8XXN2PRzAm1f-m7lhK6vJOe1HAq_rSNhbgJ-uk-RIMrotYcyTKpHAWP_DAsT0xQIpms9fo301KPMVUw).


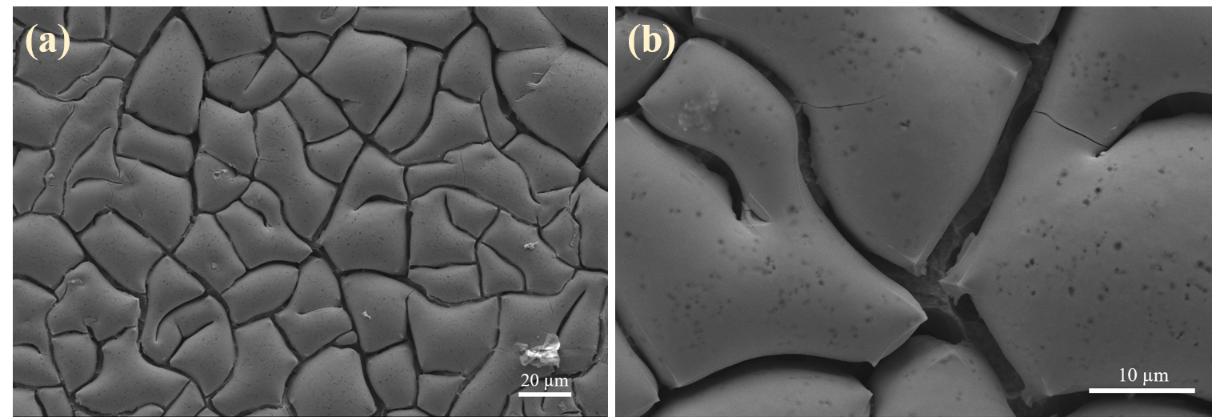


Fig. S3. SEM images of RuO2-MoO3/Ti electrode


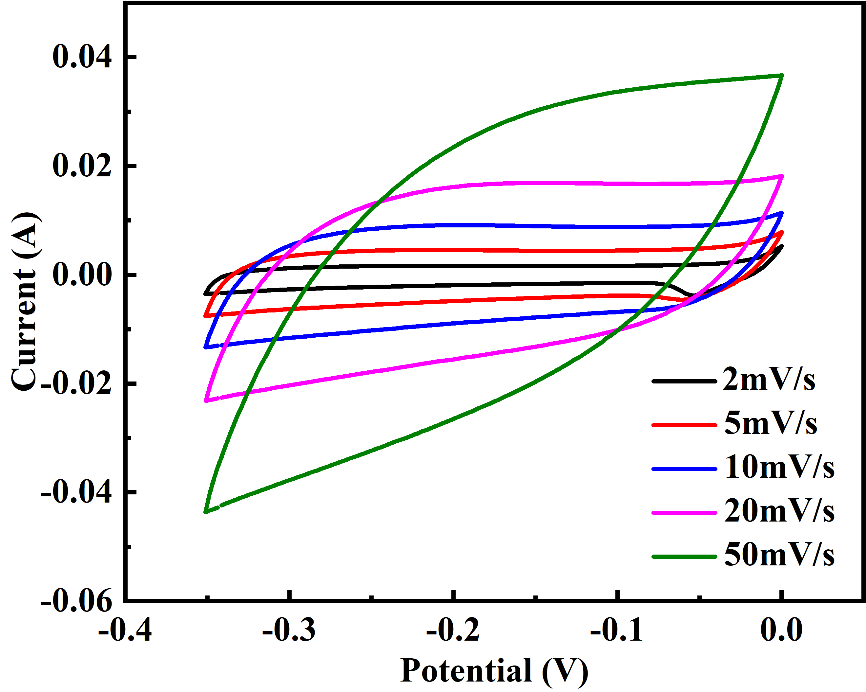


Fig. S4. Cyclic voltammetry curves of RuO2-MoO3/Ti electrode

20μm
